# Supplementary material
Source: publisher site journal article supplement (https://www.spandidos-publications.com/878/downloadSupplementary)

Figure S1. Mutation rates on the consensus sequence from the multiple sequence alignment. Specific mutation positions are highlighted by different colors in order to showcase frequencies. Blue is used to mark positions which showcase mutations on two different NRs, and green is used to mark positions which showcase mutations on 3 different NRs; red is used to mark positions which showcase mutations on four different NRs, while purple is used to mark positions which showcase mutations on 5 different NRs. NRs, nuclear receptors.

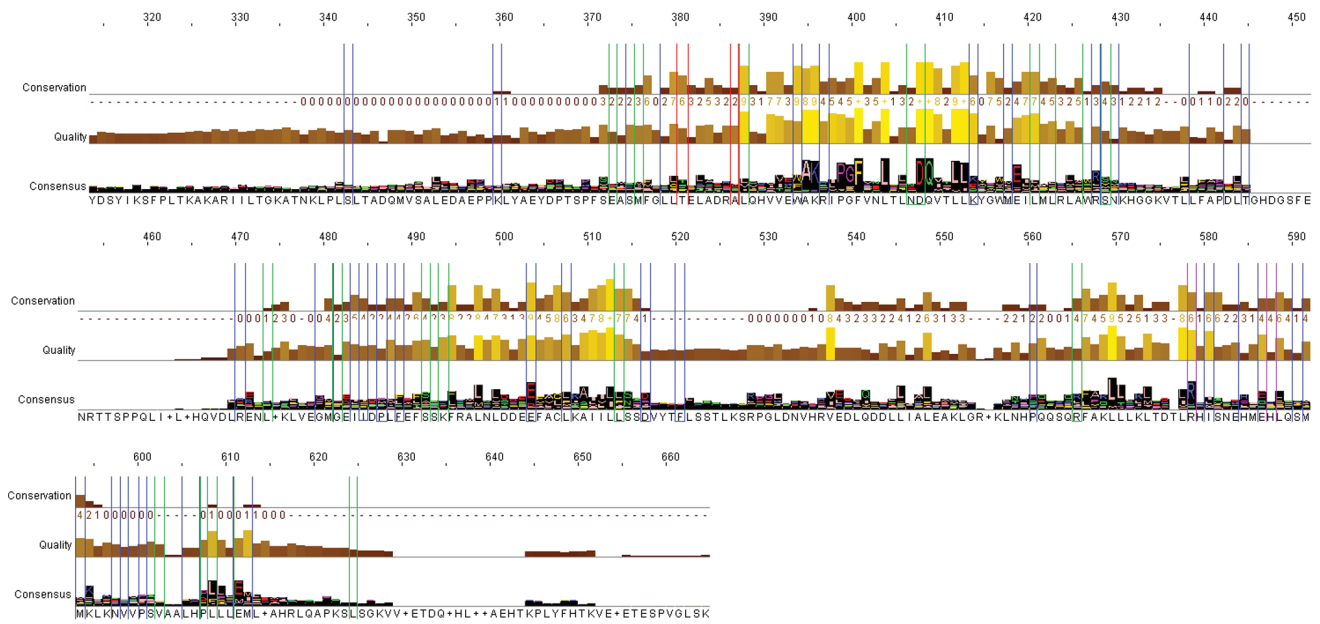

Supplement: Supplementary file 1 [file downloadSupplementary]
